# Supplementary material for: Evaluation of Hospital Cesarean Delivery–Related Profits and Rates in the United States
Source: PubMed Central journal article supplement (PMC7980096; doi:10.1001/jamanetworkopen.2021.2235), 2021-03-19
Supplement: jamanetwopen-e212235-s001.pdf [file jamanetwopen-e212235-s001.pdf]

## Supplemental Online Content

Sakai-Bizmark R, Ross MG, Estevez D, et al. Evaluation of hospital cesarean delivery–related profits and rates in the United States. *JAMA Netw Open*. 2021;4(3):e212235. doi:10.1001/jamanetworkopen.2021.2235

**eTable.** Frequencies and Percentages Associated With Maternal Comorbidities, Delivery-Related Procedures, Delivery Complications, and Postpartum Complications

This supplemental material has been provided by the authors to give readers additional information about their work.

**eTable 1: Frequencies and percentages associated with maternal comorbidities, delivery-related procedures, delivery complications, and postpartum complications**

|                                    | Profit Quartiles                  |                                       |                                       |                                       |                                       |          |
|------------------------------------|-----------------------------------|---------------------------------------|---------------------------------------|---------------------------------------|---------------------------------------|----------|
|                                    | <b>Total<br/>(n = 13,215,853)</b> | <b>Quartile 1<br/>(n = 2,356,544)</b> | <b>Quartile 2<br/>(n = 3,400,263)</b> | <b>Quartile 3<br/>(n = 4,090,553)</b> | <b>Quartile 4<br/>(n = 3,368,493)</b> | <b>P</b> |
| <b>Maternal Comorbidities</b>      |                                   |                                       |                                       |                                       |                                       |          |
| Asthma                             | 480,010 (3.6%)                    | 81,778 (3.5%)                         | 114,998 (3.4%)                        | 160,314 (3.9%)                        | 122,921 (3.6%)                        | 0.04     |
| Diabetes                           | 839,877 (6.4%)                    | 134,588 (5.7%)                        | 209,645 (6.2%)                        | 260,482 (6.4%)                        | 235,162 (7.0%)                        | <0.001   |
| Drug Dependency/Substance Abuse    | 203,627 (1.5%)                    | 48,680 (2.1%)                         | 48,905 (1.4%)                         | 61,075 (1.5%)                         | 44,967 (1.3%)                         | <0.001   |
| Hypertensive Disorder              | 1,160,759 (8.8%)                  | 192,133 (8.2%)                        | 308,162 (9.1%)                        | 385,959 (9.4%)                        | 274,505 (8.1%)                        | 0.90     |
| Obesity                            | 618,099 (4.7%)                    | 98,605 (4.2%)                         | 137,214 (4.0%)                        | 203,472 (5.0%)                        | 178,808 (5.3%)                        | <0.001   |
| Psychiatric Disease                | 484,691 (3.7%)                    | 101,459 (4.3%)                        | 124,925 (3.7%)                        | 154,696 (3.8%)                        | 103,611 (3.1%)                        | <0.001   |
| Seizure Disorder                   | 50,807 (0.4%)                     | 9,226 (0.4%)                          | 12,901 (0.4%)                         | 16,670 (0.4%)                         | 12,010 (0.4%)                         | 0.11     |
| Smoking                            | 281,948 (2.1%)                    | 41,427 (1.8%)                         | 66,769 (2.0%)                         | 104,638 (2.6%)                        | 69,114 (2.1%)                         | 0.002    |
| Thyroid Disease                    | 373,147 (2.8%)                    | 68,506 (2.9%)                         | 91,846 (2.7%)                         | 120,617 (2.9%)                        | 92,178 (2.7%)                         | 0.53     |
| <b>Delivery-Related Procedures</b> |                                   |                                       |                                       |                                       |                                       |          |
| Forceps Delivery                   | 100,142 (0.8%)                    | 19,569 (0.8%)                         | 36,814 (1.1%)                         | 28,756 (0.7%)                         | 15,003 (0.4%)                         | <0.001   |
| Vacuum Delivery                    | 709,341 (5.4%)                    | 131,500 (5.6%)                        | 166,865 (4.9%)                        | 220,642 (5.4%)                        | 190,333 (5.7%)                        | 0.03     |
| Operative Delivery (Unspecified)   | 185 (0.0%)                        | 52 (0.0%)                             | 45 (0.0%)                             | 51 (0.0%)                             | 37 (0.0%)                             | 0.11     |
| Induction of Labor                 | 3,400,245 (25.7%)                 | 613,146 (26.0%)                       | 969,292 (28.5%)                       | 1,055,818 (25.8%)                     | 761,989 (22.6%)                       | <0.001   |
| Episiotomy                         | 1,131,826 (8.6%)                  | 197,377 (8.4%)                        | 299,224 (8.8%)                        | 352,312 (8.6%)                        | 282,914 (8.4%)                        | 0.77     |
| Hysterectomy                       | 3,953 (0.0%)                      | 525 (0.0%)                            | 999 (0.0%)                            | 1,363 (0.0%)                          | 1,066 (0.0%)                          | <0.001   |
| Transfusion                        | 104,100 (0.8%)                    | 18,491 (0.8%)                         | 27,239 (0.8%)                         | 31,176 (0.8%)                         | 27,193 (0.8%)                         | 0.84     |
| Dilation and Curettage             | 41,267 (0.3%)                     | 7,471 (0.3%)                          | 10,297 (0.3%)                         | 12,833 (0.3%)                         | 10,666 (0.3%)                         | 0.72     |
| Laparotomy                         | 2,560 (0.0%)                      | 503 (0.0%)                            | 716 (0.0%)                            | 799 (0.0%)                            | 542 (0.0%)                            | 0.01     |
| <b>Delivery Complications</b>      |                                   |                                       |                                       |                                       |                                       |          |
| Hemorrhage                         | 856,185 (6.5%)                    | 166,735 (7.1%)                        | 218,364 (6.4%)                        | 266,828 (6.5%)                        | 204,258 (6.1%)                        | 0.02     |
| Infection                          | 55,956 (0.4%)                     | 8,946 (0.4%)                          | 14,384 (0.4%)                         | 18,051 (0.4%)                         | 14,575 (0.4%)                         | 0.008    |
| Laceration                         | 1,108,964 (8.4%)                  | 193,946 (8.2%)                        | 299,773 (8.8%)                        | 355,364 (8.7%)                        | 259,881 (7.7%)                        | 0.004    |
| Operative Injury                   | 8,048 (0.1%)                      | 1,179 (0.1%)                          | 2,014 (0.1%)                          | 2,646 (0.1%)                          | 2,209 (0.1%)                          | 0.002    |
| Thrombotic Event                   | 97,382 (0.7%)                     | 18,018 (0.8%)                         | 25,510 (0.8%)                         | 29,269 (0.7%)                         | 24,585 (0.7%)                         | 0.36     |
| Uterine Rupture                    | 0 (0.0%)                          | 0 (0.0%)                              | 0 (0.0%)                              | 0 (0.0%)                              | 0 (0.0%)                              | -        |

|                                                                                                     |                |               |               |               |               |        |
|-----------------------------------------------------------------------------------------------------|----------------|---------------|---------------|---------------|---------------|--------|
| Other                                                                                               | 73,362 (0.6%)  | 12,216 (0.5%) | 19,762 (0.6%) | 22,945 (0.6%) | 18,440 (0.5%) | 0.73   |
| <b>Postpartum Complications</b>                                                                     |                |               |               |               |               |        |
| Acute Cardiovascular Disease<br>(including cardiomyopathy, heart failure,<br>myocardial infarction) | 1,995 (0.0%)   | 289 (0.0%)    | 510 (0.0%)    | 683 (0.0%)    | 512 (0.0%)    | 0.09   |
| Acute Cerebrovascular Disease<br>(including stroke and intracranial<br>hemorrhage)                  | 1,646 (0.0%)   | 290 (0.0%)    | 341 (0.0%)    | 536 (0.0%)    | 479 (0.0%)    | 0.08   |
| Anesthesia Complications                                                                            | 39,280 (0.3%)  | 7,909 (0.3%)  | 10,215 (0.3%) | 11,801 (0.3%) | 9,355 (0.3%)  | <0.001 |
| Appendicitis                                                                                        | 582 (0.0%)     | 133 (0.0%)    | 138 (0.0%)    | 174 (0.0%)    | 137 (0.0%)    | 0.23   |
| Bacteremia, Sepsis                                                                                  | 2,885 (0.0%)   | 389 (0.0%)    | 637 (0.0%)    | 984 (0.0%)    | 875 (0.0%)    | <0.001 |
| Gallbladder Disease                                                                                 | 58,910 (0.4%)  | 8,966 (0.4%)  | 13,597 (0.4%) | 18,467 (0.5%) | 17,880 (0.5%) | <0.001 |
| Non-specific Postpartum Diagnosis                                                                   | 305,099 (2.3%) | 51,405 (2.2%) | 76,247 (2.2%) | 96,769 (2.4%) | 80,677 (2.4%) | 0.002  |
| Mastitis, Breast Abscess                                                                            | 1,503 (0.0%)   | 227 (0.0%)    | 449 (0.0%)    | 485 (0.0%)    | 342 (0.0%)    | 0.74   |
| Pancreatitis                                                                                        | 2,177 (0.0%)   | 341 (0.0%)    | 544 (0.0%)    | 752 (0.0%)    | 540 (0.0%)    | 0.31   |
| Upper Respiratory Infection                                                                         | 10,509 (0.1%)  | 1,862 (0.1%)  | 2,679 (0.1%)  | 3,513 (0.1%)  | 2,456 (0.1%)  | 0.40   |
| Urinary Tract Infection<br>(including pyelonephritis)                                               | 120,947 (0.9%) | 20,934 (0.9%) | 31,235 (0.9%) | 38,075 (0.9%) | 30,702 (0.9%) | 0.66   |
| Uterine Infection                                                                                   | 55,995 (0.4%)  | 7,715 (0.3%)  | 13,679 (0.4%) | 18,841 (0.5%) | 15,760 (0.5%) | <0.001 |
| Wound Infection and/or Breakdown                                                                    | 42,406 (0.3%)  | 7,921 (0.3%)  | 10,156 (0.3%) | 13,857 (0.3%) | 10,472 (0.3%) | 0.78   |
| Death                                                                                               | 375 (0.0%)     | 69 (0.0%)     | 100 (0.0%)    | 118 (0.0%)    | 86 (0.0%)     | 0.61   |
